# Supplementary material for: Effect of vascular resection for perihilar cholangiocarcinoma: a systematic review and meta-analysis
Source: PeerJ journal article supplement (doi:10.7717/peerj.12184), 2021-09-23

**A**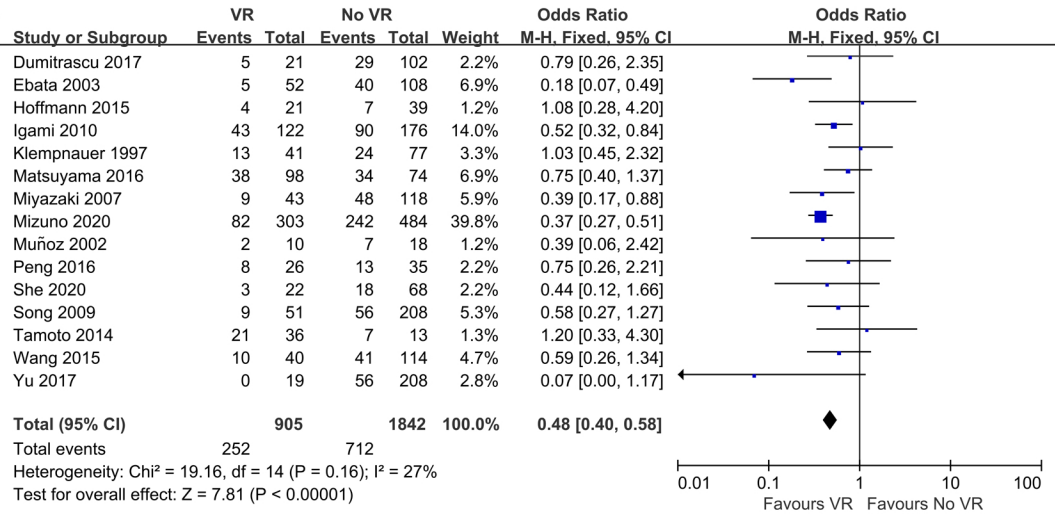**B**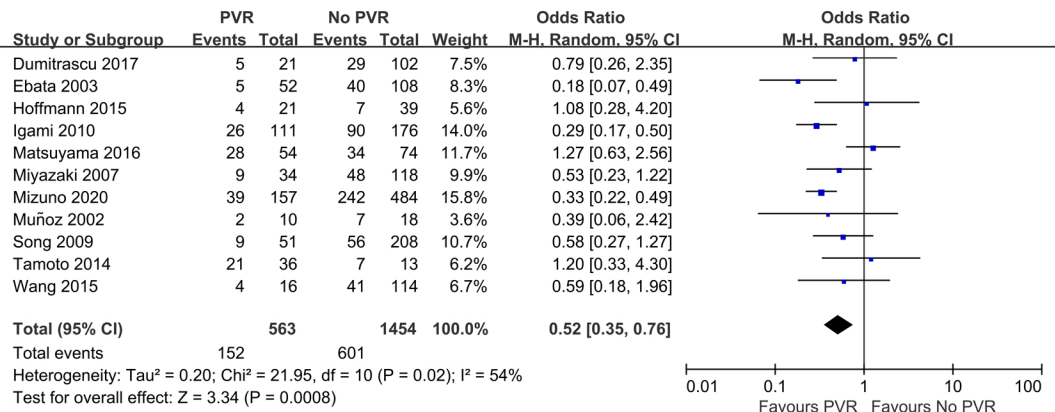**C**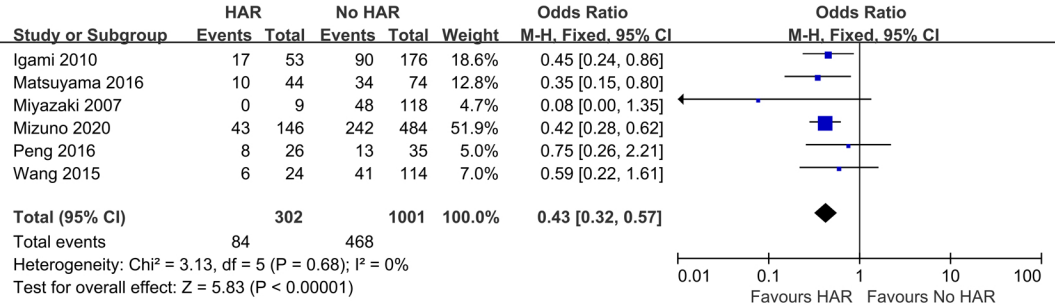

Supplement: figure_S3_staff_KT.pdf [file figure_S3_staff_KT.pdf]
