# Supplementary material for: Effect of vascular resection for perihilar cholangiocarcinoma: a systematic review and meta-analysis
Source: PeerJ journal article supplement (doi:10.7717/peerj.12184), 2021-09-23

**A**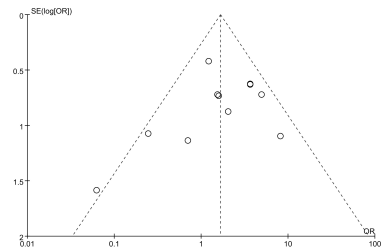**B**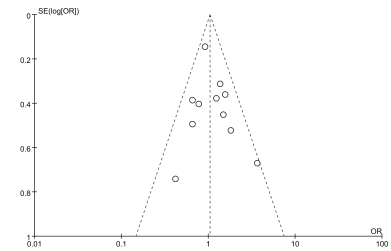**C**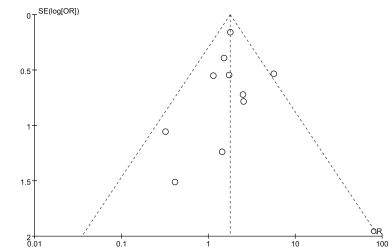**D**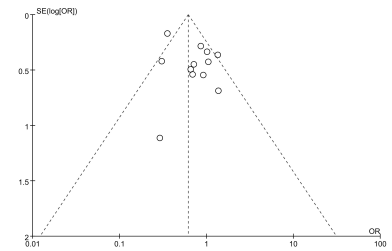**E**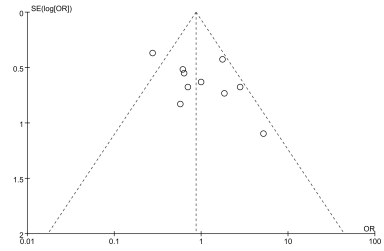**F**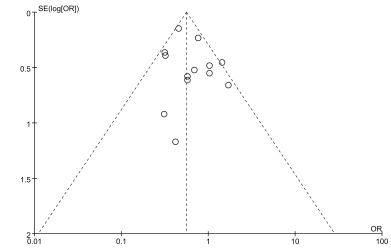**G**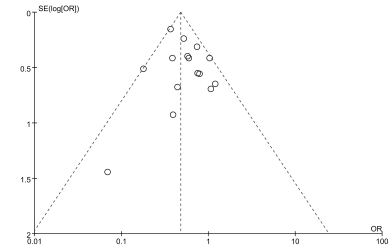**H**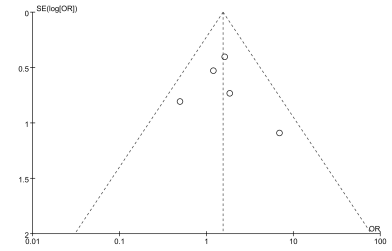**I**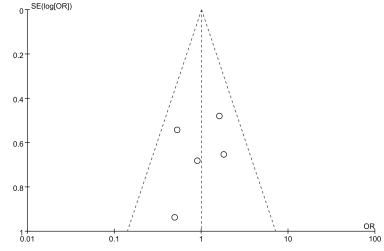**J**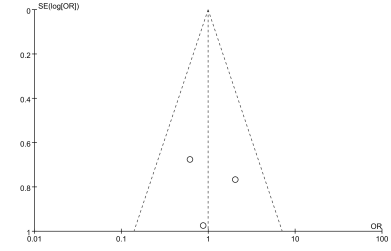**K**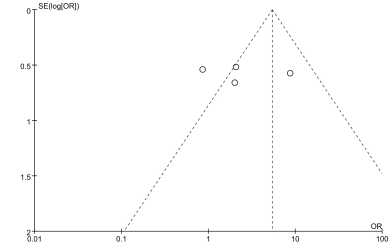**L**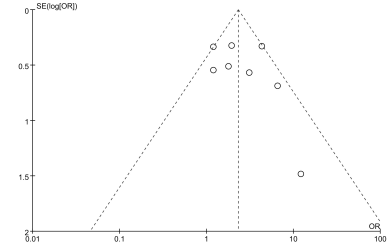**M**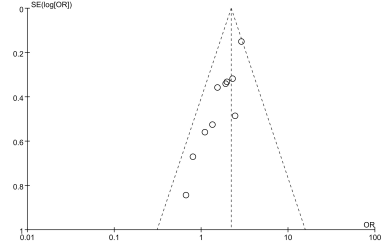**N**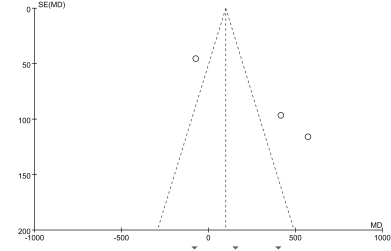

Supplement: figureS5.pdf [file figureS5.pdf]
