# Supplementary material for: Effect of vascular resection for perihilar cholangiocarcinoma: a systematic review and meta-analysis
Source: PeerJ. 2021 Sep 23;9:e12184. doi: 10.7717/peerj.12184 (PMC8466000; doi:10.7717/peerj.12184)
Supplement: Supplemental Information 8 [file peerj-09-12184-s008.xlsx]

## Sheet: data
number	first author	year of publish	Country	Hosptial	Recruitment period	aim	Selection criteria	Exclusion criteria	N(number of patients）	with VR	portal vein resection only	hepatic artery resection only	both resection	hepatic artery resection with or without portal vein resection	without VR	Bismuth-Corlette staging system	TNM classification	Preoperative biliary drainage	median drainage time	follow-up time (mean/median)	male/female				age				TBIL				blood loss				resection margins negative	resection margins positive	resection margins negative	resection margins positive	P	venous invasion			Total morbidity (%)				P
																					portal vein resection	hepatic artery resection with or without portal vein resection	without VR	total	portal vein resection	hepatic artery resection with or without portal vein resection	without VR	total	portal vein resection	hepatic artery resection with or without portal vein resection	without VR	total	portal vein resection	hepatic artery resection with or without portal vein resection	without VR	total						portal vein resection	hepatic artery resection with or without portal vein resection	without VR	portal vein resection	hepatic artery resection with or without portal vein resection	without VR	total
1	Wang 2015	2015	China	Department of Hepatic Surgery, First Affiliated Hospital, Sun Yat-Sen University	January 2005 to December 2012	to assess the effect of combined vascular resection in HCCA patients and to analyze the prognostic factors.	Only HCCA patients who had been confirmed pathologically after resection were included	patients with distal bile duct carcinoma, gallbladder tumors or intrahepatic cholangiocarcinoma; and those with radiotherapy, chemotherapy or transplantation	154	40	16	6	18	24	114	type I (n=6), II (n=11), IIIa (n=36), IIIb (n=63), and IV (n=38)	NA	74 (48.1%)	14	NA	4/12	18/6	70/44	92/62	53±7	60±9	57±12	57±13	242±102	139±137	155±129	155±113	980±511	1175±713	527±596	612±612	138	16	138	16	NA	NA	NA	NA	6 (37.5)	10 (41.7)	40 (35.1)	56 (36.4)	＞0.05
3	Dumitrascu 2017	2017	Romania	"Dan Setlacec” Center of General Surgery and Liver Transplant Fundeni Clinical Institute	Between 1996, January 1st and 2014, December 31st	to comparatively assess the early and long-term outcomes after resection for PHC with and without PVR	underwent a curative-intent surgery for PHC	with associated hepatic artery resection or with associated pancreatico-duodenectomy	123	21	21	NA	NA	NA	102	NA	NA	NA	NA	110 months (4 – 174 months) in the group of patients with-out a PVR and 56 months (4 – 80 months)in the PVR group	17/4	NA	53/49	70/53	56 (40 – 71)	NA	59 (21 – 77)	NA	8.8 (0.7 – 23)	NA	8 (0.2 – 35) mg/ dl	NA	800 (300 – 12 000)	NA	400 (100 – 15 000)	NA	R0切除 80 (78%)in noPVR组 15 (71%) in PVR组	NA	R0切除 80 (78%)in noPVR组 15 (71%) in PVR组	NA	NA	NA	NA	NA	NA	NA	NA	NA	NA
4	Ebata 2003	2003	Japan	the First Department of Surgery, Nagoya University Hospital	Between 1979 and 2000	NA	underwent tumor resection with hepatectomy and resection was macroscopically curative	underwent laparotomy and/or biliary drainage alone or underwent tumor resection without hepatectomy	160	52	52	NA	NA	NA	108	NA	VR type I (n=0), II (n=0), III (n=32 (61.5%) ), and IV (n=20 (38.5%) ) no VR type I (n=24 (22.2%)), II (n=64 (59.3%)), III (n=6 (5.6%) ), and IV (n=14 (13.0%))	NA	NA	NA	35/17	NA	81/27	116/44	60.3 ±10.6	NA	60.2 ± 10.2	NA	12.5 ± 7.5 mg/dL	NA	NA	NA	3732 ±2784 mL	NA	NA	NA	R1切除 13 (12.0%)in noPVR组 16 (30.8%) in PVR组	NA	R1切除 13 (12.0%)in noPVR组 16 (30.8%) in PVR组	NA	NA	25 (48.1%)	NA	47 (43.5%)	44	NA	85	NA	NA
5	Nagino 2010	2010	Japan	From the *Division of Surgical Oncology, Department of Surgery, Nagoya University Graduate School of Medicine	Between December 1997 and July 2009	outline our surgical experience of hepatectomy combined with simultaneous resection of the portal vein and hepatic artery, and we also discuss the clinical significance of this challenging and demanding surgery	with perihilar cholangiocarcinoma underwent resection	NA	365	154	92	12	50	NA	211	NA	NA	NA	NA	median follow-up periods 51.1 months		NA	NA	NA	60± 12	NA	NR	NA	10.8 ± 8.5 mg/dL(2.0–40.4 mg/dL）	NA	NA	NA	NA	HA and PV 2593 ± 1890 mL (426–10799 mL)	NA	NA	both 组 resection group R0 33 and R1 16，R2 1	NA	both 组 resection group R0 33 and R1 16，R2 1	NA	NA	NA	NA	NA	NA	NA	NA	NA	NA
8	Hoffmann 2015	2015	Germany	Department of General and Transplant Surgery, University Hospital Heidelberg	between 2001 and 2012	to determine the influence of PVR on perioperative and oncologic long-term outcome	extrahepatic bile duct resection and regional lymphadenectomy for a histologically confirmed HCA	with intrahepatic cholangiocarcinoma,distal cholangiocarcinoma, and/or patients with concomitant extrahepatic disease	60	21	21	NA	NA	NA	39	no PVR type I (n=0), II (n=1), IIIa (n=9), IIIb (n=6), and IV (n=23) PVR type I (n=0), II (n=0), IIIa (n=6), IIIb (n=7), and IV (n=8)	VR type I (n=0), II (n=11 (52.4%)), III (n=7 (33.3%) ), and IV (n=3 (14.3%) ) no VR type I (n=2 (5.1%) ), II (n=17 (43.5%) ), III (n=16 (40.9%) ), and IV (n=4 (10.2%))	NA	NA	NA	9/12	NA	28/11	37/23	65 (43–77)	NA	68 (37–79)	67 (37–79)	NA	NA	NA	3.4 (0.3–22.7)	900 mL	NA	1,000 mL	NA	LR only R0 23/39 (59.0%) and R1 14/39 [35.8%] Rx 2 (5.1%)	LR plusPVR R0 12/21 [57.1%] and R1 9/21 (42.8%)	LR only R0 23/39 (59.0%) and R1 14/39 [35.8%] Rx 2 (5.1%)	LR plusPVR R0 12/21 [57.1%] and R1 9/21 (42.8%)	NA	V0 12 (57.2%) V1 9 (42.8%)	NA	V0 35 (89.7%)) V1 4 (10.3%)		NA		NA	NA
9	Peng 2016	2016	China	Department of Hepatology, Sichuan University, West China Hospital	From May 2005 to May 2012	to analyze the efficacy of our technique and policy of left hepatectomy combined with hepatic artery resection without reconstruction in selected patients with hilar cholangiocarcinomas over a 7-year period	had a radical left hepatectomy for hilar cholangiocarcinoma	right or major hepatectomies and bile duct resections	61	26	NA	26	NA	NA	35	type I (n=1), II (n=21), IIIa (n=0), IIIb (n=39), and IV (n=0)	NA	NA	NA	18 months （3-68 months）	NA	18/8	20/15	38/23	NA	59 ± 7	63 ± 7	NA	NA	223 ± 104	241 ± 145	NA	NA	327 ± 146	400 ± 209	NA	LHR only R0 22/26 [72.3%]	LH only R0 28/35 [80.0%]	LHR only R0 22/26 [72.3%]	LH only R0 28/36 [80.0%]	NA	NA	NA	NA	NA	15 (57.7%)	15 (42.9%)	NA	NA
13	Schimizzi 2018	2018	United States	U.S. Extrahepatic Biliary Malignancy Consortium	from 1998 to 2015	to explore the safety and long-term outcomes of vascular resection during surgical treatment of hilar cholangiocarcinoma	with HC who underwent resection with curative intent	included planned palliative or noncurative resections including bile duct resection only, missing data onvascular resection status,or incomplete follow-up data.	201	31	19	10	2	12	170	type I (n=37), II (n=109), IIIa(n=39), and IV (n=1)	PVR type I (n=0), II (n=6), III (n=7 ), and IV (n=2 ) HAR type I (n=2), II (n=5), III (n=4 ), and IV (n=0 ) no VR type I (n=35), II (n=93 ), III (n=20), and IV (n=2)	NA	NA	22 months	10/9	6/6	69/101	85/201	62	52	66	NA	NA	NA	NA	NA	NA	NA	NA	NA	LH only R0 119/170 [70%],PVR only R0 14/19,HAR only R0 8/12,	NA	LH only R0 119/170 [70%],PVR only R0 14/19,HAR only R0 8/12,	NA	P=0.912	NA	NA	NA	13	6	114	NA	NA
15	Hemming 2011	2011	United States	University of Florida and University of California San Diego by the hepatobiliary surgery/transplant service	between July 1999 andJuly2010	NA	with HCCA undergoing surgical resection with curative intent	NA	95	42	42	NA	NA	NA	53	type I (n=0), II (n=10), IIIa (n=57), IIIb (n=18), and IV (n=4)	NA	NA	NA	32 months	NA	NA	NA	59/36	NR	NR	NR	64 ± 9 (range 24 to 85 years)	NA	NA	NA	NA	NA	NA	NA	675?329mL(range100to1,800mL)	R0切除80(84%)，R1切除15	NA	R0切除80(84%)，R1切除15	NA	NA	NA	NA	NA	NA	NA	NA	32 (36%)	NA
16	Tamoto 2014	2014	Japan	Department of Gastroenterological Surgery II, Division of Surgery, Hokkaido University GraduateSchoolofMedicine	From 2005 to 2009	toassessthesafetyand feasibility and discuss herein the oncological impact of a hepatectomy combined with a no-touch resection of hilar malignancies	with hilar cholangiocarcinoma underwent a major right-sided hepatectomy and biliary reconstruction with curative intent.	the patients who underwent a left-sided hepatectomy	49	36	36	NA	NA	NA	13	NA	VR type I (n=4), II (n=12), III (n=10 ), and IV (n=10 ) no VR type I (n=0), II (n=8), III (n=5), and IV (n=0)	45	NA	NA	25/11	NA	10/3	35/16	68.5 (56–78)	NA	68 (58–77)	NA	0.8 (0.4–1.5)	NA	0.8 (0.2–1.0)	NA	1902 (861–6010)	NA	1610 (860–3840)	NA	LH only R0 12/13 LHP only R0 28/36,	NA	LH only R0 12/13 LHP only R0 28/38,	NA	P=0.412	11	NA	0	21	NA	10	NA	NA
20	Higuchi 2019	2019	Japan	Department of Surgery, Institute of Gastroenterology, Tokyo Women’s Medical University	between 2000 and 2016	to investigate the safety and significance of vascular resection and reconstruction for PHC	underwent surgery for PHC	none	249	75	56	6	13	19	174	type IV (n=90)	NA	NA	NA	NA	38/28	13/6	126/48	177/72	69.5	67.0	70.0	NA	NA	NA	NA	NA	1364	1580	1234	NA	LR only R0 115/59 PVR only R0 35/21	HAR only R0 12/7	LR only R0 115/59 PVR only R0 35/21	HAR only R0 12/7	P=0.36	NA	NA	NA	NA	NA	NA	NA	NA
21	Lee 2010	2010	Korea	Hepatobiliary Surgery and Liver Transplantation,Department of Surgery, University of Ulsan College	Between January 2001 and December 2008	NA	underwent hepatobiliary resection	did not undergo any resectional surgery	302	43	38	3	2	NA	259	type I (n=16), II (n=41), IIIa (n=131), IIIb (n=62), and IV (n=52)	NA	NA	NA	NA	NA	NA	NA	219/83	NR	NR	NR	61（24-83）	NA	NA	NA	NA	NA	NA	NA	NA	R0 = 214(70.9%）, R1 n = 88 (29.1%）	NA	R0 = 214(70.9%）, R1 n = 88 (29.1%）	NA	NA	NA	NA	NA	NA	NA	NA	NA	NA
22	Igami 2010	2010	Japan	the First Department of Surgery, the Nagoya University Hospital	Between 2001 and 2008	to review our surgical experiences with hilar cholangiocarcinoma in the ‘‘new era’’ by focusing on the outcomes of patients treated over the past 8 years	underwent surgical resection with curative intent	underwent conservative treatment	298	122	69	53		NA	176	type I (n=15), II (n=21), IIIa (n=140), and IV (n=142)	NA	NA	NA	NA	NA	NA	NA	NA	NR	NR	NR	NA	NA	NA	NA	NA	NA	NA	NA	1862 ± 1186 ml	R0 = 220, R1 n = 70，R2 n=8	NA	R0 = 220, R1 n = 70，R2 n=8	NA	NA	NA	NA	NA	NA	NA	NA	NA	NA
23	She 2020	2020	China	Division of Hepatobiliary and Pancreatic Surgery, Department of Surgery, The University of Hong Kong	from January 1989 to December 2016	to investigate the short- and long-term outcomes of curative HC resection with and without resection plus reconstruction of the PV or HA	who received curative HC resection	NA	90	22	17	5	NA	NA	68	type I (n=12), II (n=28), IIIa (n=3),IIIb(n=30) and IV (n=16)	VR type I (n=2), II (n=5), III (n=5 ), and IV (n=10 ) no VR type I (n=10), II (n=23), III (n=28), and IV (n=6)	NA	NA	21.1 (0.3–218.3)in no VR 17.0 (1.5–111.2) in VR	14/8	NA	49/19	63/27	57.0 (37–77) (with vascular reconstruction)	NA	67.5 (29–85)	NA	22.5 (8–73)	NA	23.5 (7–366)	NA	1.5 (0.5–8.0)	NA	1.465 (0.3–20)	NA	LR only R0 38/68 and R1 28，R2 2	LPR only R0 10/22 and R1 12，R2 0	LR only R0 38/68 and R1 28，R2 2	LPR only R0 10/22 and R1 12，R2 0	NA	9	NA	19	11	NA	41	NA	NA
24	Kondo 2004	2004	Japan	Department of Surgical Oncology, Hokkaido University Graduate School of Medicine	Between July 1999 and December 2002	NA	NA	NA	40	14	8	8	2	NA	26	type I (n=7), II (n=12), IIIa (n=8),IIIb(n=7) and IV (n=6)	NA	NA	NA	NA	NA	NA	NA	34/6	NR	NR	NR	NA	NA	NA	NA	NA	NA	NA	NA	NA	R0=38 (95%)	NA	R0=38 (95%)	NA	NA	NA	NA	NA	NA	NA	NA	19 (48%)	NA
25	Jong 2012	2012	United States	7 institutions	between January 1984 and December 2010	NA	who underwent surgical resection with histologically confirmed hilar cholangiocarcinoma	NA	224	51	51	NA	NA	NA	173	type I (n=27), II (n=42), III (n=115) and IV (n=13) unknow (n=37)	NA	NA	NA	NA	29/22	NA	100/73	129/95	66(37-80)	NA	66(32-86)	NA	NA	NA	NA	NA	NA	NA	NA	NA	LR only R0 115 and R1 47，R2 3,unknow 8	LPR only R0 34 and R1 14，R2 2,unknow 1	LR only R0 115 and R1 47，R2 3,unknow 8	LPR only R0 34 and R1 14，R2 2,unknow 1	NA	25 (44)	NA	57 (32.9)	NA	NA	NA	NA	NA
26	Miyazaki 2007	2007	Japan	From the Department of General Surgery, Graduate School of Medicine, Chiba University	Between january 1981 and March 2004	to evaluate whether or not combined vascular resection of hilar cholangiocarcinoma is beneficial	potentially curative resection	NA	161	43	34	2	7	9	118	NA	PVR type I (n=0), II (n=8), III IV (n=24 ) HAR type I (n=0), II (n=1), III IV (n=8 ) no VR type I (n=7), II (n=93 ), III (n=88), and IV (n=25)	149	NA	NA	18/16	7/2	77/41	102/59	64 ±9	59 ±9	65 ±11	64 ±10	1.7 ± 1.6	2.6 ± 1.1	2.1 ±1.4	2.1 ± 1.4	1,975 ± 1,474	1,726 ± 1,253	1,523 ± 1,147	1,590 ± 1,214	NA	NA	NA	NA	NA	29	9	102	13	7	42	NA	NA
27	Muñoz 2002	2002	United States	The Mount Sinai School of Medicine, Recanati / Miller Transplantation Institute	between January 1990 and January 2001	to determine whether portal resection and reconstruction can be performed safely	undergoing potentially curative resection for hilar cholangiocarcinoma	Patients with intrahepatic cholangiocarcinoma or distal bile duct carcinoma	28	10	10	NA	NA	NA	18	NA	NA	NA	NA	28 months (median, 17months)	7/3	NA	5/13	12/16	61 (46–74)	NA	66 (48–83)	64 (46–83)	NA	NA	NA	NA	NA	NA	NA	NA	NA	NA	NA	NA	NA	NA	NA	NA	NA	NA	NA	NA	NA
28	Klempnauer 1997	1997	Germany	the Clinic of Abdominal and Transplantation Surgery, and Department of Pathology, Hanover Medical School	From January 1, 1971 to December 31, 1995	NA	The tumor could be conventionally resected	NA	118	41	40	NA	1	NA	77	NA	NA	NA	NA	NA	NA	NA	NA	NA	NR	NR	NR	NA	NA	NA	NA	NA	NA	NA	NA	NA	LR R0 61,R1 16,R2 0	LPR R0 30,R1 9,R2 2	LR R0 61,R1 16,R2 0	LPR R0 30,R1 9,R2 2	NA	NA	NA	NA	NA	NA	NA	NA	NA
29	Matsuyama 2016	2016	Japan	Department of Gastroenterological Surgery, Yokohama City University Graduate School of Medicine	Between April 1992 and March 2014	to assess the efficacy of combined resection and reconstruction (CRR) of the hepatic artery (HA) in surgery for hilar cholangiocarcinoma	underwent surgery with curative intent	NA	172	98	54	44	NA	NA	74	no VR type I , II , III (n=59) and IV (n=15) PVR type I , II , III (n=43) and IV (n=11) HAR type I , II , III (n=22) and IV (n=22)	NA	NA	NA	38.2 months	39/15	27/17	55/19	121/51	70 (40–80)	69 (55–85)	69 (32–86)	NA	0.7 (0.4)	1.0 (0.8)	1.2 (0.8)	NA	1981 (1926)	2212 (2192)	1929 (1387)	NA	LR R0 55,R1 19,	LPR R0 43,R1 11,LHR R0 35,R1 9,	LR R0 55,R1 19,	LPR R0 43,R1 11,LHR R0 35,R1 9,	NA	27	35	21	38	36	61	NA	NA
30	Yu 2017	2017	China	Sun Yat-Sen Memorial Hospital, Sun Yat-Sen University	Between January 2006 and December 2014	to elucidate whether combined vascular resection and reconstruction for HCCA was beneficial and evaluate the safety and efficacy of this procedure for selected advanced HCCA patients	R0 resection confirmed pathologically	not R0 resection	95	19	10	6	3	NA	76	type I(n=9) , II= (n=8), IIIa (n=9), IIIb (n=31), and IV (n=38)	NA	NA	NA	32 months,	14/5	NA	43/33	57/38	55.40±11.88	NA	61.03±10.48	59.9	242.8±137.14	NA	213.11±143.95	NA	563.16±377.4	NA	NA	NA	NA	NA	NA	NA	NA	7	NA	12	16	NA	45	NA	NA
31	Mizuno 2020	2020	Japan	Division of Surgical Oncology, Department of Surgery, Nagoya University Graduate School of Medicine	between 2001 and 2018	NA	patients who were diagnosed with PHC	NA	787	303	157	46	100	146	484	type I , II, III (n=446), and IV (n=341)	NA	NA	NA	59 months ( 25–102 months)	49/108	39/38	162/322	260/468	67 (40–84)	67 (31–89)	69 (30–85)	NA	NA	NA	NA	NA	1498 (283–11115)	1491 (225–7100)	1078 (46–5391)	NA	LR R0 410,R1 67,R2 7	PVR R0 108,R1 43,R2 6 ,HAR R0 93,R1 452,R2 1	LR R0 410,R1 67,R2 7	PVR R0 108,R1 43,R2 6 ,HAR R0 93,R1 52,R2 1	NA	NA	NA	NA	145	NA	242	NA	NA
33	Song 2009	2009	Korea	University of Ulsan College of Medicine	from June 1989 to June 2005	to determine the safety and the survival benefit of PVR in resection for HCCA	resection was feasible	NA	259	51	51	NA	NA	NA	208	NA	NA	NA	NA	NA	NA	NA	NA		NR	NR	NR	57.9±9.4	NA	NA	NA	NA	NA	NA	NA	NA	totol R0 186(71.8%)R1 59	NA	totol R0 186(71.8%)R1 59	NA	NA	28	NA	NA	24	NA	82	NA	NA
[truncated: 46 more columns]

## Sheet: NOS score
number	first author and year of publish	Representativeness	Selection of non-exposed	Ascertainment of exposure	Outcome not present at start	Comparability of cohorts	Assessment of outcome	Long enough follow-up (≥ 2 years)	Adequacy (completeness) of follow-up	Total
1	Shu-Tong Wang 2015	1	1	1	1	1	1	0	1	7
3	Traian Dumitrascu 2017	1	1	1	1	1	1	1	1	8
4	Tomoki Ebata 2003	1	1	1	1	1	1	0	1	7
5	Masato Nagino 2010	1	1	1	1	1	1	1	1	8
8	Katrin Hoffmann 2015	1	1	1	1	1	1	0	1	7
9	Chihan Peng 2016	0	1	1	1	1	1	0	1	6
13	Gregory V. Schimizzi 2018	1	1	1	1	0	1	0	1	6
15	Alan W Hemming 2011	1	1	1	1	1	1	1	1	8
16	Eiji Tamoto 2014	0	1	1	1	1	1	0	1	6
20	Ryota Higuchi 2019	1	1	1	1	1	1	0	1	7
21	Sung Gyu Lee 2010	1	1	1	1	1	1	0	1	7
22	Tsuyoshi Igami 2010	1	1	1	1	1	1	0	1	7
23	Wong Hoi She 2020	1	1	1	1	1	1	0	1	7
24	Satoshi Kondo 2004	1	1	1	1	1	1	0	1	7
25	Mechteld C. de Jong 2012	1	1	1	1	1	1	0	1	7
26	Masaru Miyazaki 2007	1	1	1	1	1	1	0	1	7
27	Luis Muñoz 2002	1	1	1	1	1	1	1	1	8
28	Jrgen Klempnauer 1997	1	1	1	1	1	1	0	1	7
29	Ryusei Matsuyama 2016	1	1	1	1	1	1	1	1	8
30	Zhimin Yu 2017	1	1	1	1	1	1	1	1	8
31	Takashi Mizuno 2020	1	1	1	1	1	1	1	1	8
33	Gi-Won Song 2009	1	1	1	1	1	1	0	1	7

## Sheet:  morbidity and mortality
	1					3					8					9					13					16					20					21					22					23
	without VR	PVR only	AR with and without PVR	both PVR and AR	total	without VR	PVR	AR	both PVR and AR	total	without VR	PVR	AR	both PVR and AR	total	without VR	PVR	AR	both PVR and AR	total	without VR	PVR	AR	both PVR and AR	total	without VR	PVR	AR	both PVR and AR	total	without VR	PVR	AR	both PVR and AR	total	without VR	PVR	AR	both PVR and AR	total	without VR	PVR	AR	both PVR and AR	total	without VR	PVR	AR	both PVR and AR
Total morbidity (%)	40 (35.1)	6 (37.5)	10 (41.7)		56 (36.4)											15 (42.9%)		15 (57.7%)			114	13	6			10	21			31										130（43%）					129 (43%)	41 (60.3)	11 (50.0)
Bile leakage	17	2	3		22	27 (26%)	4 (19%)				22	4				3		2								0	2			2															34 (11)
Wound infection	8	2	2		12											2		1								1	4			5															40 (13)
Intra-abdominal abscess	4	0	0		4											1		2								3	2			5															53 (18)
Hepatic insufficiency	2	0	1		3	12 (12%)	9 (43%)				17	12				3		5			7	3	0			2	2			4															18 (6)
Sepsis	2	2	1		5																																								19 (6)
Pneumonia	2	0	1		3											2		2								0	1			1															4 (1)
Abdominal hemorrhage	1	0	1		2	5 (5%)	2 (10%)				9	9														3	2			5	3 (1.7%)	1 (1.8%)	1 (5.3%)												7 (2)		0
Gastrointestinal hemorrhage	1	0	0		1
Internal hernia	1	0	0		1
Bilioenteric anastomotic stenosis	1	0	0		1
Hemolytic anemia	0	0	1		1
Portal vein thrombosis						1 (1%)	2 (9.5%)																								1 (0.6%)	5 (8.9%)	0												5 (2)		0
Myocardial infarction	1	0	0		1
Severe postoperative complications (grade III-IV Dindo)						19 (19%)	5 (24%)				11	21				5		5													58 (33%)	25 (45%)	9 (47%) P=0.19							23 (7.0%)
Vascular complications																															5 (3%)	7 (13%)	5 (26%) P＜0.001
Total mortality(30d)																					12 (7)	3	0																							7 (10.3)	0 (0)
Total mortality(90d)	4	0	1		5	5 (5%)	2 (10%)				5(12.8%)	4(19.1%)														2	0			2	3	3	3 P=0.009												6 (2)	11 (16.2)	1 (4.5)
Hepatic failure	2	0	1		3
Sepsis	1	0	0		1
Abdominal hemorrhage	1	0	0		1
Postoperative hospital stay, days						15 (1 – 65)	15 (4 – 40)									19 (14 – 31)		21 (14 – 40)								32 (18–88)	35.5 (17–146)																			21.0 (6–214)	9.0 (6–85)
Completion of adjuvant therapy						48 (47%)	11 (52%)														79	8	6																							10 (14.7)	5 (22.7)
In-hospital mortality																										1	1													5（1.7%）						10 (14.7)	0 (0)
Tumour recurrence											14 (45.2%)	8(57.1%									55 (35)	9	6			6	12																			38	16
Time to disease recurrence (months), median																																														14.9 (1.9–180.5)	11.3 (3.7–55.3)
[truncated: 51 more columns]

## Sheet: OS and RFS
13							14				25				26				33
	OS			RFS				median survival time			OS				OS				OS
	HR	95%CI	P value	HR	95%CI	P value			95% CI	p		HR	95%CI	P value		HR	95%CI	P value		HR	95%CI	P value
without VR		reference			reference		R0 resection	58 months	36–81 months		without VR	reference			without VR	reference			without VR	reference
PVR	0.9	0.5–2.2	0.993	1.7	0.8–3.3	0.138	R1 resection	26 months	14–31 months	p＜0.01	PVR	0.94	0.65-1.38	P =0 .76	PVR	1.57	1.031-2.391	0.0354	PVR
AR	1	0.5–2.2	0.964	0.6	0.3–1.3	0.176					AR				AR	2.293	1.052-5.000	0.0369	AR
R0	Reference	Reference									R0	Reference	Reference						R0	Reference	Reference	P=0.031
R1	1.2	0.7–1.9	0.468	1	0.7–1.5	0.974					R1	2.4	1.76-3.28	P < .001					R1	1.373	0.973-1.938
											R2	2.7	1.44-5.07	P=0.002					R2	1.992	1.054-3.766
											microscopic vascular invasion	1.23	0.95-1.69	P =0.19
